# Supplementary material for: The Encyclopedia of Life v2: Providing Global Access to Knowledge About Life on Earth
Source: Biodivers Data J. 2014 Apr 29;(2):e1079. doi: 10.3897/BDJ.2.e1079 (PMC4031434; doi:10.3897/BDJ.2.e1079)
Supplement: Supplementary material 1 — Taxa with Content [file biodiversity_data_journal-2-e1079-s001.csv]

Pages with Content
from Stats page & quarterly reports, presentations
Date	Pages with content
2008	50000	estimated
2009	180000	estimated
2010	400000	estimated
2011	710000	estimated
2012	1,117,799
2013	1,337,020
