# Supplementary material for: The Encyclopedia of Life v2: Providing Global Access to Knowledge About Life on Earth
Source: Biodivers Data J. 2014 Apr 29;(2):e1079. doi: 10.3897/BDJ.2.e1079 (PMC4031434; doi:10.3897/BDJ.2.e1079)
Supplement: Supplementary material 2 — Number of Resources [file biodiversity_data_journal-2-e1079-s002.csv]

Date	Published Resources
2008	11
2009	35
2010	81
2011	186
2012	274
2013	384
