# Supplementary material for: The Encyclopedia of Life v2: Providing Global Access to Knowledge About Life on Earth
Source: Biodivers Data J. 2014 Apr 29;(2):e1079. doi: 10.3897/BDJ.2.e1079 (PMC4031434; doi:10.3897/BDJ.2.e1079)
Supplement: Supplementary material 3 — Registered Members [file biodiversity_data_journal-2-e1079-s003.csv]

Date	Members
2008	21000	estimated
2009	25594
2010	31881
2011	37995
2012	56565
2013	67903
