# Supplementary material for: The Encyclopedia of Life v2: Providing Global Access to Knowledge About Life on Earth
Source: Biodivers Data J. 2014 Apr 29;(2):e1079. doi: 10.3897/BDJ.2.e1079 (PMC4031434; doi:10.3897/BDJ.2.e1079)
Supplement: Supplementary material 4 — License Distribution [file biodiversity_data_journal-2-e1079-s004.csv]

License	Images	Maps	Articles	Videos	Sounds
cc-by-nc-sa	1106840	596265	1124420	2018	28468
cc-by-nc	394802	65226	665759	7711	1898
cc-by-sa	125400	0	225944	85	0
cc-by	110411	145173	1031660	332	0
public domain/cc zero/no known copyright restrictions	70939	0	144805	73	0
gnu-gpl/gnu-fdl	3903	0	21	0	0
