# Supplementary material for: The Encyclopedia of Life v2: Providing Global Access to Knowledge About Life on Earth
Source: Biodivers Data J. 2014 Apr 29;(2):e1079. doi: 10.3897/BDJ.2.e1079 (PMC4031434; doi:10.3897/BDJ.2.e1079)
Supplement: Supplementary material 5 — Curator Activity [file biodiversity_data_journal-2-e1079-s005.csv]

	Common Names	Exemplar Content	Curate Data Object	Cropping	Add Article	Classifications
Assistant Curators	13231	837	243	10	11	0
Full & Master Curators	8142	10013	117432	3376	5593	5562
