# Supplementary material for: The Encyclopedia of Life v2: Providing Global Access to Knowledge About Life on Earth
Source: Biodivers Data J. 2014 Apr 29;(2):e1079. doi: 10.3897/BDJ.2.e1079 (PMC4031434; doi:10.3897/BDJ.2.e1079)
Supplement: Supplementary material 6 — Data Object Rating [file biodiversity_data_journal-2-e1079-s006.csv]

	Non-Curators	Assistant Curators	Full & Master Curators
1 star	660	839	56752
2 star	423	699	39636
3 star	455	527	47432
4 star	789	479	24827
5 star	2968	587	13808
